# Supplementary material
Source: Springer Nature journal article supplement (https://www.springermedizin.de/resource/supplementary/12891_2011_1327_MOESM3_ESM.pdf/9507580)

Fig. 3

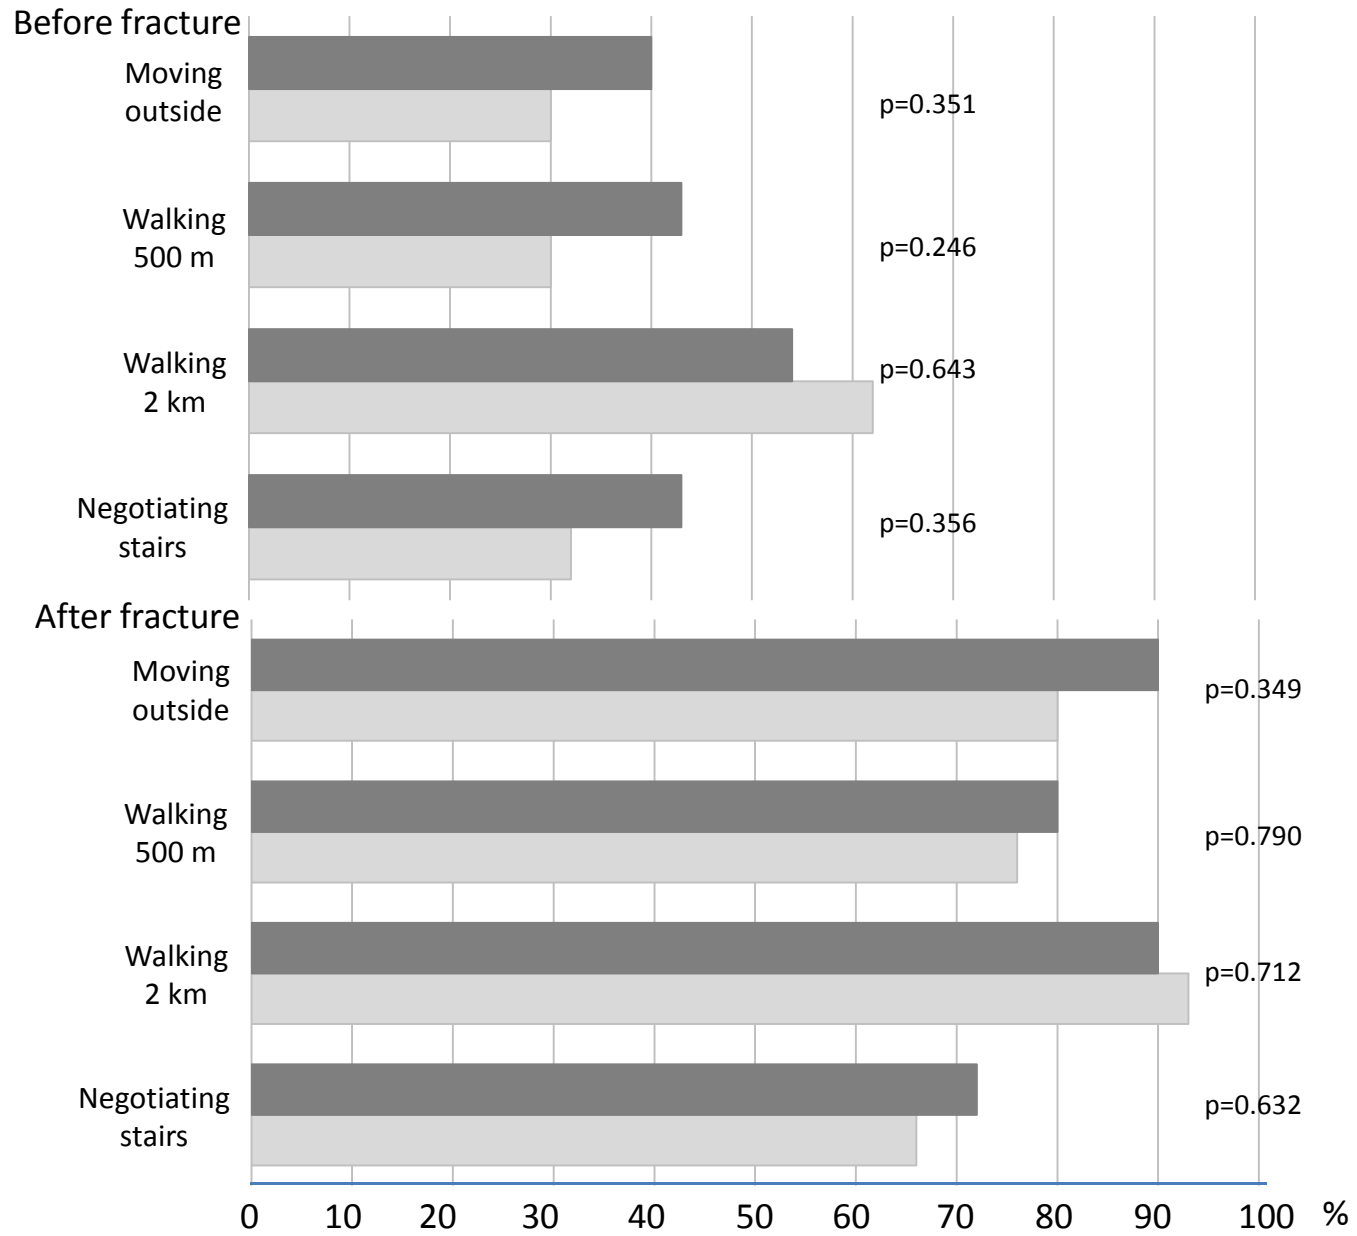

Supplement: MOESM3 [file 9507580]
